# Supplementary material for: Generating colorblind-friendly scatter plots for single-cell data
Source: eLife journal article supplement (doi:10.7554/elife.82128), 2022-12-16
Supplement: supp1 [file elife-82128-supp1-v2.pdf]

# Creating a Scatterplot with Texture

Tejas Guha

November 5, 2022

## Installing ScatterHatch

scatterHatch requires R (version 4.2) and can be installed through BioConductor using the following commands.

```
if (!require("BiocManager", quietly = TRUE))
  install.packages("BiocManager")

BiocManager::install("scatterHatch")
```

If you do not have BiocManager, the installation can be done using the *devtools* package.

```
library(devtools)
install_github("FertigLab/scatterHatch")
```

Once scatterHatch has been successfully installed run the following command to load *scatterHatch* onto your R session.

```
library(scatterHatch)
```

## Preparing the Data

The data that will be used to showcase the function is [a tissue-CyCIF PDAC dataset from Lin et al.](#) The preprocessing begins by adding manual annotations of each cell's location in the tissue sample.

```
data("pdacData")
pdacData$cellID = paste0('cell_', 1:nrow(pdacData))
pdacData$Yt <- -pdacData$Yt
pancreas_frames = c(1:6, 27:31, 15:19, 40:44)
PDAC_frames = c(23:26, 35:37, 51:52, 64:65, 77)
small_intestines_frames = c(49:50, 63, 75:76, 88:89, 100:103, 112:116, 125:129, 137:140)
annotateLocation <- function(frame){
  if (frame %in% pancreas_frames){return("Pancreas")}
  if (frame %in% PDAC_frames){return("PDAC")}
  if (frame %in% small_intestines_frames){return("Small Intestine")}
  return("Other")
}
pdacData$location = sapply(pdacData$frame, annotateLocation)

head(pdacData[, c('Xt', 'Yt', 'location', 'frame')])
#>      Xt      Yt location frame
#> 1 1342.878 -801.154 Pancreas    1
#> 2  5688.494 -1391.393 Pancreas    4
#> 3  6295.826 -1393.807 Pancreas    4
#> 4  5344.257 -1391.650 Pancreas    4
#> 5  5640.034 -1391.416 Pancreas    4
#> 6  5923.357 -1390.776 Pancreas    4
```

## Creating a Basic ScatterHatch Plot

scatterHatch() must have a data frame passed to it, along with three strings denoting the columns with the x/y coordinates and a factor variable of each point being plotted. The factor variable identifies the group each point is a part of. scatterHatch() returns a ggplot2 object with three layers; the points, the line segments (the hatching), and an invisible custom geom to render the legend icons.

```
plt <- scatterHatch(data = pdacData, x = "Xt", y = "Yt",
  color_by = "location", legendTitle = "Tissue Type")
plot(plt)
```

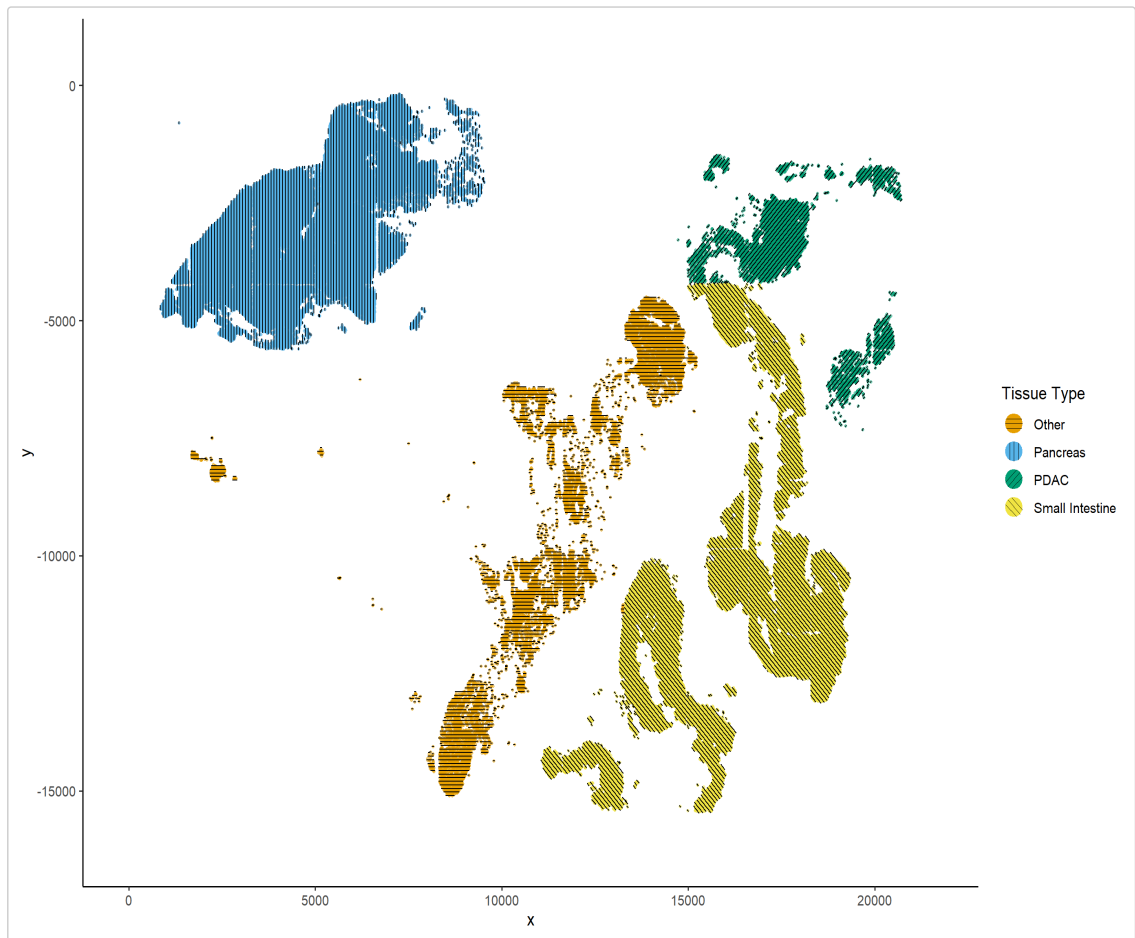

## Customizing ScatterHatch Plot

### Changing the Order of Pattern Assignment

Controlling the aesthetics of each pattern is achieved by passing a list to the `patternList` argument. Each element of the list should contain a list that denotes the desired aesthetics for each pattern. Every element of `patternList` must have a named element called "pattern" that describes the unique pattern type. If `patternList` is passed, then the length of `patternList` must be equal to the number of groups being plotted.

### Changing the Angles of each Pattern

Angle denotes the angle(s) for which the lines of a particular hatching pattern should be drawn. For example, the default horizontal pattern ("-") is an angle of 0 while the default vertical pattern ("|") is an angle of 90. Angle can be a vector with multiple angles. For example, the cross ("x") is a vector of angles: `c(135, 45)`.

```
patternList = list(list(pattern="/", angle = 70), list(pattern="-"), list(pattern="x", angle = c(135,
  90, 45), lineWidth = 0.2), list(pattern="+"))
plt <- scatterHatch(data = pdacData, x = "Xt", y = "Yt",
  color_by = "location", legendTitle = "Tissue Type",
  patternList = patternList)
plot(plt)
```

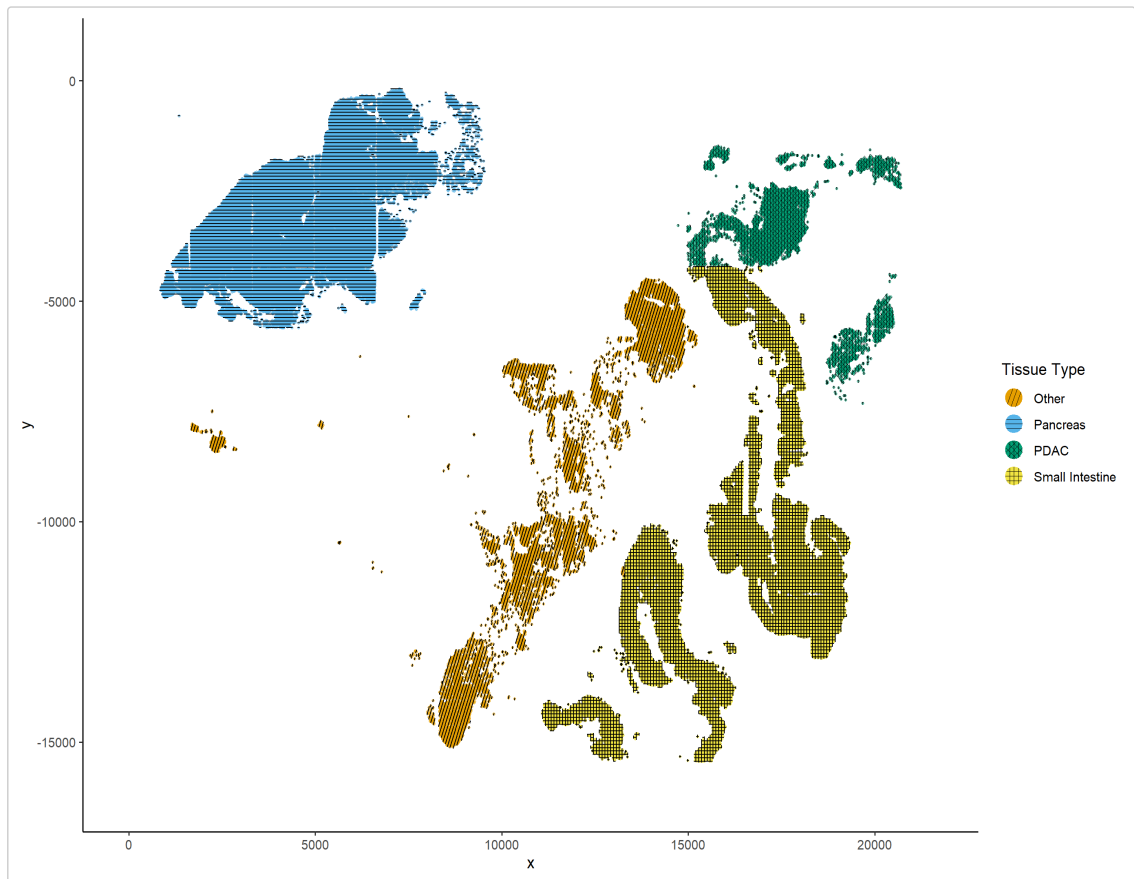

## scatterHatch() Arguments Explained

| Argument     | Description                                                                                                                                                              |
|--------------|--------------------------------------------------------------------------------------------------------------------------------------------------------------------------|
| data         | A dataframe of the dataset being plotted                                                                                                                                 |
| x            | A string describing the column name with the x-coordinates of the points being plotted                                                                                   |
| y            | A string describing the column name with the y-coordinates of the points being plotted                                                                                   |
| factor       | A string describing the column name of the factor variable                                                                                                               |
| legendTitle  | The legend title                                                                                                                                                         |
| pointSize    | ggplot2 point size                                                                                                                                                       |
| pointAlpha   | Transparency of each point                                                                                                                                               |
| gridSize     | Integer describing the precision of the hatched patterns. Larger the value, greater the precision at the expense of efficiency. Default segregates plots into 10000 bins |
| sparsePoints | A logical vector that denotes the outlying points. Default utilizes an in-built sparsity detector                                                                        |
| patternList  | List containing the aesthetics of each pattern                                                                                                                           |
| colorPalette | Character vector describing the point color of each group; default is color-blind friendly and uses colors from the dittoSeq package                                     |

## Pattern Aesthetics Arguments

These pattern aesthetics are passed into a list in the patternList argument of `scatterHatch()`.

| Aesthetics | Description                                                                                                                                                                                                          |
|------------|----------------------------------------------------------------------------------------------------------------------------------------------------------------------------------------------------------------------|
| pattern    | A string representing one of the possible 7 patterns to be used: (horizontal or '-'), (vertical or ' '), (positiveDiagonal or '/'), (negativeDiagonal or '\'), (checkers or '+'), (cross or 'x'), and (blank or ""). |
| angle      | Vector or number denoting at what angle(s) the lines in a hatching pattern should be drawn - e.g. <code>c(45, 90, 135)</code>                                                                                        |
| lineWidth  | Number representing the width of the lines in the pattern                                                                                                                                                            |
| lineColor  | String representing the colors of the lines in the pattern (black, white, etc.)                                                                                                                                      |

---

## Aesthetics Description

---

lineType String representing the type of lines in the pattern (solid, dashed, etc.)

---

## Session Info

---

```
sessionInfo()
#> R version 4.0.2 (2020-06-22)
#> Platform: x86_64-w64-mingw32/x64 (64-bit)
#> Running under: Windows 10 x64 (build 19044)
#>
#> Matrix products: default
#>
#> Locale:
#> [1] LC_COLLATE=English_United States.1252
#> [2] LC_CTYPE=English_United States.1252
#> [3] LC_MONETARY=English_United States.1252
#> [4] LC_NUMERIC=C
#> [5] LC_TIME=English_United States.1252
#>
#> attached base packages:
#> [1] stats      graphics  grDevices  utils      datasets  methods   base
#>
#> other attached packages:
#> [1] scatterHatch_0.99.2
#>
#> Loaded via a namespace (and not attached):
#> [1] Rcpp_1.0.8          highr_0.9           plyr_1.8.6
#> [4] compiler_4.0.2     pillar_1.7.0       tools_4.0.2
#> [7] digest_0.6.29      evaluate_0.15      lifecycle_1.0.1
#> [10] tibble_3.1.6       gtable_0.3.0       lattice_0.20-41
#> [13] pkgconfig_2.0.3    rlang_1.0.1        Matrix_1.2-18
#> [16] cli_3.2.0          rstudioapi_0.13    yaml_2.3.5
#> [19] xfun_0.29          fastmap_1.1.0      spatstat.data_2.2-0
#> [22] dplyr_1.0.8        stringr_1.4.0      knitr_1.37
#> [25] generics_0.1.2     vctrs_0.3.8        spatstat.utils_2.3-1
#> [28] tidyselect_1.1.2   grid_4.0.2         glue_1.6.2
#> [31] R6_2.5.1           fansi_1.0.2        spatstat.geom_2.4-0
#> [34] rmarkdown_2.11     polyclip_1.10-0    farver_2.1.1
#> [37] purrr_0.3.4        ggplot2_3.3.6      deldir_1.0-6
#> [40] magrittr_2.0.2     scales_1.2.0       htmltools_0.5.2
#> [43] ellipsis_0.3.2    colorspace_2.0-3   labeling_0.4.2
#> [46] utf8_1.2.2         stringi_1.7.6      munsell_0.5.0
#> [49] crayon_1.5.1
```
